# Supplementary material for: One-pot template-free synthesis of heterophase BiVO4microspheres with enhanced photocatalytic activity
Source: Royal Society of Chemistry journal article supplement (doi:10.1039/c5ra09785a), 2015-01-01
Supplement: c5ra09785a1.pdf [file c5ra09785a1.pdf]

## Supporting Information

### **One-pot template-free synthesis of heterophase BiVO<sub>4</sub> microspheres with enhanced photocatalytic activity**

Yin Hu,<sup>a,b</sup> Danzhen Li,<sup>\*b</sup> Fuqian Sun,<sup>a</sup> Huibin Wang,<sup>a</sup> Yaqing Weng,<sup>a</sup> Wei Xiong<sup>a</sup>

and Yu Shao<sup>b</sup>

<sup>a</sup> Research Institute of Applied Chemistry, Jiangxi Academy of Sciences, Nanchang,  
Jiangxi, 330096, P. R. China

<sup>b</sup> Research Institute of Photocatalysis, State Key Laboratory of Photocatalysis on  
Energy and Environment, Fuzhou University, Fuzhou, 350002, P. R. China. Fax: +86-  
591-83779256; Tel: +86-591-83779256; E-mail: dzli@fzu.edu.cn

**Summary:** This file contains 4 figures.

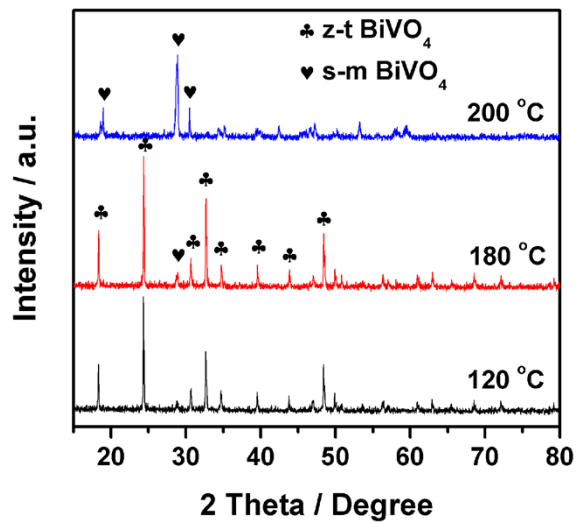

**Fig. S1.** XRD patterns of BiVO<sub>4</sub> synthesized at different temperatures for 48 h with Bi/V molar ratio of 4/1.

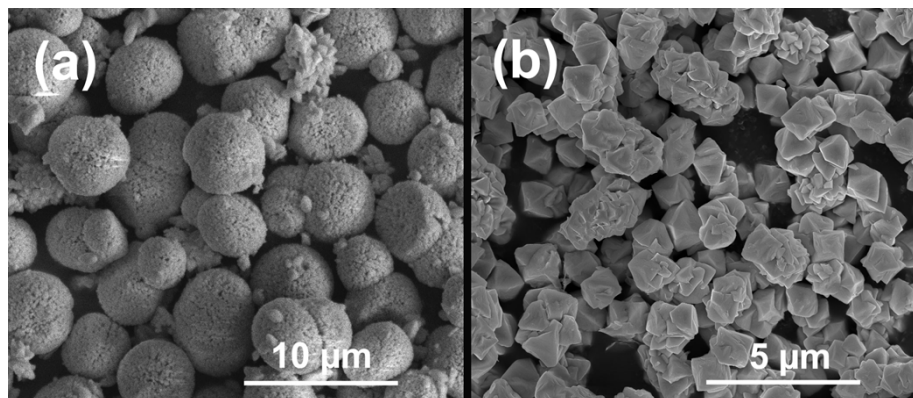

**Fig. S2.** FESEM images of the BiVO<sub>4</sub> samples with Bi/V molar ratio of 4/1 prepared at different reaction temperatures for 48 h: (a) 120 °C; (b) 200 °C.

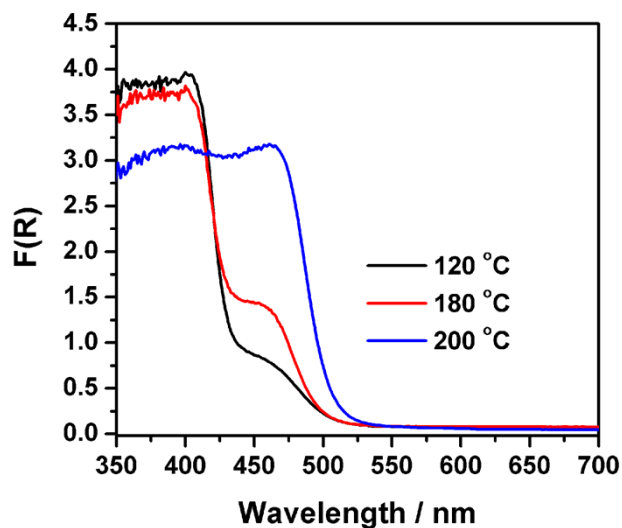

**Fig. S3.** DRS of  $\text{BiVO}_4$  samples with Bi/V molar ratio of 4/1 prepared at different reaction temperatures for 48 h.

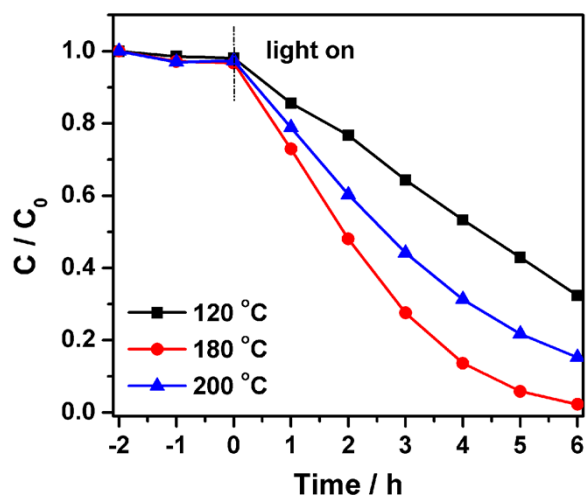

**Fig. S4.** Degradation curves of RhB over the  $\text{BiVO}_4$  samples with Bi/V molar ratio of 4/1 prepared at different reaction temperatures for 48 h under visible light irradiation.
